1 **Title:** Genome Sequence of Indian Peacock Reveals the Peculiar Case of a Glittering  
2 Bird

3 **Authors:** Shubham K. Jaiswal<sup>+1</sup>, Ankit Gupta<sup>+1</sup>, Rituja Saxena<sup>1</sup>, Vishnu Prasoodanan P. K.<sup>1</sup>,  
4 Ashok K. Sharma<sup>1</sup>, Parul Mittal<sup>1</sup>, Ankita Roy<sup>1</sup>, Aaron B.A. Shafer<sup>3</sup>, Nagarjun Vijay<sup>2</sup>, Vineet  
5 K. Sharma\*<sup>1</sup>

6 **Affiliation:**

7 <sup>1</sup>Metagenomics and Systems Biology Group, Department of Biological Sciences, Indian  
8 Institute of Science Education and Research Bhopal, India

9 <sup>2</sup>Computational Evolutionary Genomics Lab, Department of Biological Sciences, Indian  
10 Institute of Science Education and Research Bhopal, India

11 <sup>3</sup>Forensic Science and Environmental & Life Sciences, Trent University, Canada

12

13 \*Corresponding Author email:

14 Vineet K. Sharma - [vineetks@iiserb.ac.in](mailto:vineetks@iiserb.ac.in)

15 †These authors contributed equally to this work

16 Email addresses of authors:

17 Shubham K. Jaiswal – [shubhamj@iiserb.ac.in](mailto:shubhamj@iiserb.ac.in), Ankit Gupta - [ankitg@iiserb.ac.in](mailto:ankitg@iiserb.ac.in), Aaron

18 B.A. Shafer - [aaronshafer@trentu.ca](mailto:aaronshafer@trentu.ca), Rituja Saxena – [ritus@iiserb.ac.in](mailto:ritus@iiserb.ac.in), Vishnu Prasoodanan

19 P. K.- [vishnup16@iiserb.ac.in](mailto:vishnup16@iiserb.ac.in), Ashok K. Sharma – [ashok@iiserb.ac.in](mailto:ashok@iiserb.ac.in), Parul Mittal -

20 [parulm@iiserb.ac.in](mailto:parulm@iiserb.ac.in), Ankita Roy – [rankitauga@gmail.com](mailto:rankitauga@gmail.com), Nagarjun Vijay -

21 [nagarjun@iiserb.ac.in](mailto:nagarjun@iiserb.ac.in)

22 Number of words = 7,341 & Number of Figures = 4

23

24 **ABSTRACT**

25 The unique ornamental features and extreme sexual traits of Peacock have always intrigued  
26 the scientists. However, the genomic evidence to explain its phenotype are yet unknown.  
27 Thus, we report the first genome sequence and comparative analysis of peacock with the  
28 available high-quality genomes of chicken, turkey, duck, flycatcher and zebra finch. The  
29 candidate genes involved in early developmental pathways including TGF- $\beta$ , BMP, and Wnt  
30 signaling pathway, which are also involved in feather patterning, bone morphogenesis, and  
31 skeletal muscle development, showed signs of adaptive evolution and provided useful clues  
32 on the phenotype of peacock. The innate and adaptive immune components such as  
33 complement system and T-cell response also showed signs of adaptive evolution in peacock  
34 suggesting their possible role in building a robust immune system which is consistent with  
35 the between species predictions of Hamilton-Zuk hypothesis. This study provides novel  
36 genomic and evolutionary insights into the molecular understanding towards the phenotypic  
37 evolution of Indian peacock.

38 **Keywords:** Peacock genome, Peafowl, Comparative genomics, dN/dS, positive selection,  
39 Adaptive evolution, Hamilton-Zuk hypothesis

40

## 41 INTRODUCTION

42 One of the most glittering bird, the Indian peafowl (*Pavo cristatus*), is an avian species that  
43 had once puzzled the greatest naturalist, Charles Darwin, who wrote - “the sight of a feather  
44 in a Peacock’s tail, whenever I gaze at it, makes me sick” (Huxley, 1968). The presence of  
45 an exceptional ornamental plumage with large tail-coverts in peacock, which makes it more  
46 visible to predators attack, posed a question for his theory of natural selection. However, later  
47 studies showed its significance for the reproductive success of peacock mediated by sexual  
48 selection. The *Pavo* genus from the family Phasianidae has two known species, *Pavo*  
49 *cristatus* (Blue peafowl) and *Pavo muticus* (Green peafowl), which diverged about 3 million  
50 years ago (OUYANG et al., 2009). The Blue peafowl (Indian Peacock) is endemic to the  
51 Indian subcontinent, whereas, the Green Peafowl is mostly found in Southeast Asia.

52 Peacock (male peafowl) is one of the largest known bird among pheasants and flying birds. It  
53 shows sexual dimorphism, polygamy with no paternal care to offspring, and an elaborate  
54 male display for mating success (Zahavi, 1975;Ramesh and McGowan, 2009). The sexual  
55 selection is extreme in peacock, which is dependent upon the ornamental display (glittering  
56 train and crest plumage) and behavioral traits (Loyau et al., 2005a). These ornamental  
57 features are also used as an honest signal about their immunocompetence to the peahen,  
58 which helps in the selection of individuals with better immunity (Loyau et al., 2005b).  
59 Though, the male masculine traits are testosterone-dependent in peacock, the large train is the  
60 default state since the peahen also shows the development of this train after  
61 ovariectomy(Owens and Short, 1995).

62 The existence of intricate ornaments in peacock has perplexed the scientists for decades and  
63 has led to several ecological and population-based studies (Zahavi, 1975;Loyau et al.,  
64 2005a;Ramesh and McGowan, 2009). However, the genomic details about the phenotypic  
65 evolution of this species are still unknown. Therefore, we carried out the comprehensive  
66 comparative genomics of *Pavo cristatus* (Blue Peafowl) to decipher the genomic evolution of  
67 this species. The ornamental and sexual characteristics of peacock are distinct from other  
68 birds and are absent in the available closely related species such as chicken and turkey, which  
69 makes it intriguing to look for the genomic changes underlying the phenotypic divergence of  
70 peacock. Therefore, we also carried out a comprehensive comparative genome-wide analysis  
71 of peacock genome (order Galliformes) with the high quality genomes of five other birds  
72 under the class Aves: chicken and turkey (order Galliformes), duck (order Anseriformes), and  
73 flycatcher and zebra finch (order Passeriformes). The comparative genome-wide analysis of

74 peacock with five other related birds provided novel genomic insights into the intriguing  
75 peacock genome evolution.

76

77

## 78 **MATERIALS AND METHODS**

79

### 80 *Sample collection, DNA isolation, and sequencing of peacock genome*

81 Approximately 2 ml blood was drawn from the medial metatarsal vein of a two years old  
82 male Indian peacock at Van Vihar National Park, Bhopal, India and was collected in EDTA-  
83 coated vials. The fresh blood sample was immediately brought to the laboratory at 4 °C and  
84 genomic DNA was extracted using DNeasy Blood and Tissue Kit (Qiagen, USA) following  
85 the manufacturer's protocol. Sex of the bird was determined to be male by morphological  
86 identification and was confirmed using molecular sexing assay (Supplementary Note).  
87 Multiple shotgun genomic libraries were prepared using Illumina TruSeq DNA PCR-free  
88 library preparation kit and Nextera XT sample preparation kit (Illumina Inc., USA), as per the  
89 manufacturer's protocol. The insert size for the TruSeq libraries was selected to be 550 bp  
90 and the average insert size for Nextera XT libraries was ~650 bp. The sequencing library size  
91 for both the libraries was assessed on 2100 Bioanalyzer using High Sensitivity DNA kit  
92 (Agilent, USA). The libraries were quantified using KAPA SYBR FAST qPCR Master mix  
93 with Illumina standards and primer premix (KAPA Biosystems, USA), and Qubit dsDNA HS  
94 kit on a Qubit 2.0 fluorometer (Life Technologies, USA) as per the Illumina suggested  
95 protocol. The normalised libraries were loaded on Illumina NextSeq 500 platform using  
96 NextSeq 500/550 v2 sequencing reagent kit (Illumina Inc., USA) and 150 bp paired-end  
97 sequencing was performed for all the libraries on May 11, 2016.

### 98 **Sequence alignment and phylogenetic tree construction**

99 All sequence alignments (DNA and Protein) used for the phylogenetic tree reconstruction and  
100 other sequence divergence analysis were generated using MUSCLE release 3.8.31 (Edgar,  
101 2004). The likelihood-based tree-searching algorithm was used for phylogenetic tree  
102 reconstruction using PhyML version 3.1 (Guindon et al., 2010). For nucleotide sequences  
103 GTR model was used, whereas for protein sequences JTT model was utilized. The  
104 bootstrapping value of n=1000 was used to test the robustness of the constructed  
105 phylogenetic trees of mitochondrial genome and concatenated nuclear-genes.

## 106 **Gene gain/loss analysis**

107 To estimate the gene gain and loss in gene families, CAFE (v3.1)(Han et al., 2013) with a  
108 random birth and death model was used (Supplementary Figure 7). The species tree was  
109 constructed using NCBI taxonomy, and the branch lengths were calculated using the fossil  
110 data in TimeTree as described in Ensembl Compara pipeline(Vilella et al., 2009). Simulated  
111 data based on the properties of observed data was generated using the command gene family  
112 and the significance of two-lambda model (separate lambda values for Galloanserae) was  
113 assessed against a global lambda model. The two-parameter model was found to fit the data  
114 better because the observed LR [LR = 2\*(score of global lambda model – score of multi-  
115 lambda model)] was greater than 95% of the distribution of simulated LRs. Therefore, the  
116 two-lambda model was used for the following CAFE analysis.

## 117 **Identification of CDS with multiple signs of adaptive evolution**

118 All validated peacock coding gene sequences (>90% valid bases) were analyzed through  
119 multiple sequence-based analysis such as dN/dS or  $\omega$  (ratio of the rate of non-synonymous to  
120 the rate of synonymous substitutions) enrichment, positive selection, and unique substitution  
121 to assess the adaptive sequence divergence. The functional analysis was performed using  
122 KEGG (Kanehisa and Goto, 2000), eggNOGs (Huerta-Cepas et al., 2016) and NCBI NR  
123 (O'Leary et al., 2016) databases. Furthermore, the functional impact of the identified unique  
124 substitutions and other sequence variations were evaluated using functional domain analysis  
125 and SIFT (Sorting Intolerant from tolerant) analysis (Kumar et al., 2009). SIFT is a  
126 homology-based method, where the specific-amino acids of protein sequence conserved  
127 across species are considered to be functionally crucial.

### 128 *dN/dS enrichment analysis*

129 Based on the dN/dS or  $\omega$  values, the positively selected ( $\omega > 1$ ), negatively selected ( $\omega < 1$ )  
130 and neutrally selected ( $\omega = 1$ ) genes were identified. The dN/dS values for the peacock CDS  
131 were calculated using CODEML program of the PAML package 4.9(Yang, 2007). The  
132 pairwise dN/dS analysis was performed on the orthologous genes for six different pairs:  
133 peacock-chicken, peacock-turkey, peacock-duck, peacock-zebra finch, peacock-flycatcher  
134 and chicken-turkey using default parameters. To check for the convergence of calculated  
135 values, the iterations were performed with three different initial or fixed  $\omega$  values, i.e. 0.5, 1  
136 and 1.5, and only the coding gene sequences with consensus values were considered. To  
137 reduce the false positives and aberrant dN/dS values from analysis all the genes with the  
138 dN/dS values above five were not used for the function interpretation of results and for

139 drawing conclusions out of it, although, they were used at the eggNOG and KEGG functional  
140 classification stage to reduce the bias.

#### 141 *Positive selection analysis*

142 The multiple sequence alignment for each peacock coding gene sequence and the  
143 corresponding orthologs identified using reciprocal blast approach in the other five bird  
144 genomes were carried out using EMBOSS tranalign program (Rice et al., 2000). Furthermore,  
145 the Maximum Likelihood-based (ML) phylogenetic tree was constructed using the amino  
146 acid sequence of these orthologs. Based on the alignment and the phylogenetic tree, the  
147 calculations of likelihood scores with revised branch-site model A was performed to identify  
148 the signatures of positive selection in peacock for the considered coding gene sequence. This  
149 model tries to detect positive selection acting on specific sites on the particular specified  
150 branch (foreground branches) (Yang et al., 2005; Zhang et al., 2005). The foreground branch  
151 consisted of peacock, and the other branches constituted the ‘background branches’. Codons  
152 were categorized into previously assumed four classes in the model based on the foreground  
153 and background estimates of dN/dS ( $\omega$ ) values. The alternative hypothesis, according to  
154 which the foreground branches show positive selection with  $\omega > 1$ , was compared with the  
155 null hypothesis, according to which all branches have the same  $\omega = 1$  value. The comparison  
156 was performed using LRT (Likelihood Ratio Test) values based chi-square test. The genes  
157 with P-value  $< 0.05$  were considered to be positively selected in peacock. Additionally, the  
158 amino acid sites under positive selection were identified using the Bayesian Empirical Bayes  
159 values for the branch-site model A (Zhang et al., 2005). This positive selection analysis was  
160 performed using CODEML program of the PAML package version 4.9 (Yang, 2007).

#### 161 *Unique substitution analysis*

162 The peacock coding gene sequence and its orthologs identified from the five bird genomes  
163 were translated using EMBOSS transeq and the protein sequence alignments were performed  
164 using MUSCLE release 3.8.31 (Edgar, 2004). Using custom-made Perl scripts, the positions  
165 at which the peacock protein showed amino acid substitutions in comparison to all the other  
166 five bird genomes were identified and reported as the unique substitutions in peacock  
167 genome.

#### 168 **Estimation of effective population size ( $N_e$ ) history**

169 The demographic history of the peacock was reconstructed by estimating the effective  
170 population size ( $N_e$ ) over time using pairwise sequentially Markovian coalescent (PSMC) (Li

171 and Durbin, 2011). The autosomal data of the peacock diploid genome sequence was filtered  
172 by excluding sites at which the inferred consensus quality was below 20, and the read depth  
173 was either one-third or more than twice of the average read depth across the genome. Since,  
174 mean coverage and percentage of missing data, both are important filtering thresholds in  
175 PSMC analysis, the minimum length of the contigs selected for carrying out the analysis was  
176 5000 bp based on no more than 25% of the missing data as suggested by Krystyna et al.  
177 (Nadachowska-Brzyska et al., 2016) (**Supplementary Figure 5**). The resultant filtered  
178 genome sequence used for the analysis was 76% of the total genome. The parameters for  
179 PSMC were set to "N30 -t5 -r5 -p4+30\*24+610", which were used previously for 38 bird  
180 species (Nadachowska-Brzyska et al., 2015). Generation time and mutation rate are necessary  
181 to scale the results of PSMC analysis to real time. Hence, a generation time of 4 years was  
182 used in this analysis and was calculated as twice of the sexual maturity (2 years) [26]. The  
183 \*mutation rate of 1.33e-09 was used as calculated in a previous study (Wright et al., 2015). It  
184 is known that the estimates of  $N_e$  from PSMC can be influenced by the quality of the genome  
185 and sequencing coverage. To ensure that our results are not strongly influenced by such  
186 artefacts, 100 bootstrap runs were performed to estimate the  $N_e$  from different parts of the  
187 genome to ascertain variability in the estimates of  $N_e$ .

#### 188 **Accession codes**

189 Sequence data for *Pavo cristatus* has been deposited in Short Read Archive under project  
190 number SRP083005 (BioProject accession: PRJNA040135, Biosample accession:  
191 SAMN05660020) and accession codes : SRR4068853 and SRR4068854.

192

## 193 **RESULTS**

194

195 Although more than fifty bird genomes have been sequenced so far, yet the comprehensive  
196 and curated gene set is available only for the handful of bird genomes at the Ensembl  
197 browser. Thus, the comparative genomics analysis was performed using only the high quality  
198 genome assemblies of species relatively closer to pheasants which were available at the  
199 Ensembl browser.

200 The whole genome sequencing of peacock genome yielded 153.7 Gb of sequence data  
201 (~136x genomic coverage; **Supplementary Table 1 and Supplementary Figure 1 and 2**).  
202 High-quality sequence reads were used to generate a draft genome assembly of an estimated

203 genome size of 1.13 Gb using Abyss, Gapcloser, and Agouti (**Supplementary Table 2**). The  
204 de novo genome scaffold and contig N50s were 25.6 Kb and 19.3 Kb, respectively  
205 (**Supplementary Table 2**). BUSCO scores assessed the genome assembly to be 77.6%  
206 complete (S:63.44%, D:14.2%) and predicted 13.5% as partial, and 8.9% as missing  
207 BUSCOs (**Supplementary Table 3**). Using ab initio-based approach, 25,963 coding  
208 sequences were identified in peacock, and in addition, 213 tRNAs, 236 snoRNAs, and 540  
209 miRNAs were also identified (**Supplementary Table 4**). The peacock genome was found to  
210 have less repetitive DNA (8.62%) as compared to chicken (9.45%) (**Supplementary Table**  
211 **5**). PSMC analysis suggested that the peacock suffered at least two bottlenecks (around four  
212 Million and 450,000 years ago), which resulted in a severe reduction in its effective  
213 population size (**Figure 1**). It was also interesting to note that the results of PSMC analysis of  
214 peacock were similar to the demographic history of the tropical bowerbird and turkey vulture  
215 that show long-term decrease in the effective population size (Nadachowska-Brzyska et al.,  
216 2015), perhaps because all three birds are native to the tropical rain forests.

217 Using a combination of homology and *ab initio* based approaches, 15,970 protein-coding  
218 genes were identified in peacock by utilizing the peacock genome assembly and the filtered  
219 high quality reads from previous study (**Supplementary Methods**). The comparison of single  
220 nucleotide variants (SNVs) between chicken and peacock revealed 2,051,161 heterozygous  
221 SNVs at a rate of 2.05 SNV per Kb. The observed SNV rate in peacock was closer to turkey  
222 in comparison to the other avian species (**Supplementary Note and Supplementary Table**  
223 **6**).

224 The analysis of gene gain/loss in gene families was also performed for the six bird genomes  
225 namely peacock, chicken, turkey, duck, flycatcher and zebra finch. The Venn diagram of the  
226 genes families for these bird genomes is shown in **Figure 2A**. Additionally, the phylogenetic  
227 tree showing the gene gain/loss for the six bird genomes and the outlier green anole is  
228 displayed in **Figure 2B**. It is apparent that the common ancestor to the birds in the  
229 phylogenetic tree show a loss of 2,295 genes, which is also supported by a previous report  
230 mentioning the loss of around 2000 genes in the ancestor as compared to other vertebrate  
231 lineages (Huang et al., 2013; Lovell et al., 2014). However, such observations could be an  
232 artefact of poor genome coverage in the GC-rich regions and incomplete genome assemblies  
233 (Bornelöv et al., 2017). This can also lead to an over or under-estimation of gene counts due  
234 to fragmentation of genes on multiple contigs and gaps in the assembly (Denton et al., 2014).  
235 We observed that contraction has been more prominent in comparison to expansion for the



236 common ancestor of Galliformes and Anseriformes and the same pattern has also been  
237 observed for turkey and duck (**Figure 2B**). These observations corroborates with the previous  
238 study (Huang et al., 2013). However, an opposite pattern of expansion in gene families was  
239 observed for peacock and chicken (**Figure 2B**). The top 20 protein families featuring gain  
240 and loss in the peacock genome are listed in **Supplementary Table 7, 8 and 9**.

241 The phylogenetic position of peacock was determined using a maximum likelihood-based  
242 analysis performed using the coding sequences of 5,907 orthologous genes identified from  
243 the six bird genomes : peacock, chicken, turkey, duck, flycatcher and zebra finch genomes  
244 (**Supplementary Note**). From the phylogenetic tree, it was apparent that peacock is closer to  
245 chicken than turkey in the Galliformes order, and formed a monophyletic group with duck  
246 from Anseriformes order (**Figure 3A**). The genome-wide analysis confirms the earlier studies  
247 carried out using limited coding and non-coding sequences, and chromosomal banding  
248 patterns (Stock and Bunch, 1982;Kaiser et al., 2007;Wang et al., 2013). The branch-specific  
249  $\omega$  or dN/dS (ratio of the rate of non-synonymous to synonymous substitutions) values were  
250 lower for chicken and peacock in comparison to the other bird genomes (**Figure 3A**). The  
251 mitochondrial genome, which evolves independent of the nuclear genome, was also used to  
252 infer the phylogenetic relationships using the complete mitochondrial genome sequences of  
253 peacock and 22 species from five different classes of Chordates, which included Aves,  
254 Mammalia, Reptilia, Actinopterygii and Amphibia (**Supplementary Figure 3**). The  
255 phylogenetic positions of the six bird species were found similar in both the trees (**Figure 1A**,  
256 **Supplementary Figure 4**). Furthermore, the distribution of  $\omega$  values and log-transformed  
257 mean  $\omega$  values for the 5,907 orthologous genes showed the evolutionary closeness of peacock  
258 and chicken in comparison to peacock and turkey and supported the observations made from  
259 the phylogenetic trees (**Figure 3B**). The phylogenetic analysis carried out using nuclear-  
260 genes and mitochondrial genomes revealed that peacock is closer to chicken as compared to  
261 turkey, which confirms the phylogenetic position of peacock through a genome-wide  
262 analysis, in addition to the earlier reports from limited molecular data (Stock and Bunch,  
263 1982;Kimball et al., 1999;Kan et al., 2010;Wang et al., 2013).

#### 264 **Divergence and adaptive evolution**

265 A comparative genomic analysis was performed using 15,970 peacock genes and their  
266 corresponding orthologs present in chicken, turkey, duck, flycatcher and zebra finch. The  
267 dN/dS values  $>1$  was shown by 74 genes, of which 25 genes had values above five indicating  
268 possible false positives, and were not considered for the functional interpretation

269 **(Supplementary Table 10)**. A total of 491 genes displayed the signs of positive selection  
270 identified using branch-site model A and the statistical significance was evaluated using  
271 likelihood ratio tests with p-value threshold of 0.05 **(Supplementary Table 11)**. Unique  
272 amino-acid substitutions in peacock were found for 3,238 genes, of which the substitutions in  
273 116 genes were predicted to affect the protein function using SIFT (Sorting Intolerant from  
274 Tolerant) analysis **(Supplementary Table 12 and 13)**. A total of 417 genes contained amino  
275 acid sites, which were under significant positive selection based on the Bayesian empirical  
276 Bayes values. In total 99 genes showed positive selection and unique amino acid substitutions  
277 that may affect the protein function predicted using SIFT and are referred to as genes with  
278 ‘multiple signs of adaptation’ (MSA) in this study **(Supplementary Table 14)**.

279 The functional analysis revealed the role of these genes in key cellular processes such as cell  
280 proliferation and differentiation (MAPK, RAS, PI3K-Akt, ErbB, Hippo, Rap1, and Jak-STAT  
281 signaling, Wnt signaling, calcium signaling and adrenergic signaling in cardiomyocytes) and  
282 immune response (T cell receptor, Toll-like receptor signaling, NOD-like receptor signaling,  
283 complement and coagulation cascade and chemokine-chemokine signaling). In addition,  
284 multiple genes involved in early development pathways such as TGF- $\beta$ , Wnt/ $\beta$ -catenin, FGF,  
285 and BMP signaling also showed adaptive sequence divergence in peacock. These cellular  
286 processes and pathways regulate key features such as early development, feather  
287 development, bone morphogenesis, skeletal muscle development, metabolism, and immune  
288 response **(Supplementary Table 15)**.

289 An interesting observation was made from the signalling pathways such as Wnt, Rap1, Ras,  
290 Jak-Stat, and cAMP-mediated GPCR signalling. It was observed that the ligand and/or  
291 receptor, and in some cases the final effector genes showed adaptive evolution, whereas the  
292 genes involved in the intermediate signal transduction processes remained conserved perhaps  
293 due to their common role in multiple signaling pathways **(Supplementary Note)**. Another  
294 interesting observation was that in several interacting protein pairs, both the interacting  
295 proteins showed sequence divergence hinting towards their co-evolution (Moyle et al., 1994).  
296 These protein pairs were majorly involved in early development pathways such as Wnt, BMP  
297 and TGF- $\beta$  signalling, cell cycle regulation, DNA replication, GPCR signaling, and gene  
298 expression regulation **(Supplementary Table 16)**.

## 299 **Adaptive evolution of early developmental pathways**

300 The early developmental pathways, which are crucial in guiding the embryonic development  
301 in birds such as TGF- $\beta$ , Wnt, FGF and BMP signaling, showed adaptive divergence in  
302 peacock (Klaus and Birchmeier, 2008). Among these pathways, the TGF- $\beta$  pathway is known  
303 to regulate the cartilage connective tissue development (Loveridge et al., 1993), and also  
304 functions as an activator of feather development in birds. In this pathway, TGFBR3 gene  
305 showed MSA, and TGF- $\beta$ 3 preproprotein, TGFBRAP1, and TAB3 genes showed multiple  
306 unique substitutions (**Supplementary Note**). The Wnt signaling pathway is involved in  
307 development, regeneration, aging process (Brack et al., 2007;Klaus and Birchmeier, 2008),  
308 and also regulates the initial placement of feather buds and their consolidation within the  
309 feather field (Lim and Nusse, 2013). Multiple regulators of Wnt signaling such as WNT2,  
310 WIF1, and DKK2 genes had positively selected amino acid sites and showed signs of  
311 adaptive evolution. The WIF1 and DKK2 genes also harbored multiple unique substitutions.  
312 Furthermore, the DKK2 and WNT2 genes were found to be positively selected in peacock.  
313 APCDD1 gene, which is an inhibitor of Wnt signaling pathway, showed MSA. The Bone  
314 Morphogenetic Protein (BMP) signaling is involved in the development of skeletal muscles,  
315 bone and cartilage connective tissue (Nie et al., 2006;Nishimura et al., 2012), neurogenesis  
316 (Groppe et al., 2002), and feather formation and patterning. Multiple genes such as BRK-3,  
317 BMP5, BMP3, BMP10 and CRIM1, which are involved in the regulation of BMP pathways  
318 and the corresponding early development, showed unique substitutions that may affect their  
319 function in cellular pathways as compared to the other birds.

320 In addition, the Notch-2 receptor gene of Notch-Delta signaling, which is involved in growth  
321 and patterning of feather buds, early development of sensory organs (Crowe et al., 1998), and  
322 terminal muscle differentiation also showed five unique substitutions. Unique substitutions  
323 were also found in the FGFR3 receptor gene and FGF23 genes, which are part of the FGF  
324 signaling involved in limb and skeletal muscle development, feather development and  
325 morphogenesis, and regulation of feather density and patterning (Pownall and Isaacs, 2010).

326 Taken together, the multiple signs of evolution observed in the genes of early development  
327 pathways in peacock suggest the adaptive divergence of the early development processes,  
328 including feather, bone and skeletomuscle development.

### 329 *Peacock feathers: Clues from early development genes*

330 Among the distinctive features of a peacock, the large and decorative feathers attract the most  
331 attention; particularly the long train, which is useful for their courtship behavior. The feather

332 development in birds is primarily guided by the continuous reciprocal interactions between  
333 the epithelium and mesenchyme (Chuong et al., 2000). The analysis of the curated set of  
334 2,146 feather-related genes (**Supplementary Note**) involved in feather development revealed  
335 that the activators of feather development including FGF, Wnt/ $\beta$ -catenin and TGF- $\beta$  and, the  
336 inhibitors such as BMP and Notch-delta showed sequence divergence in peacock in  
337 comparison to the other bird genomes. The observed divergence in genes related to feather  
338 development provides useful genomic clues for the peculiar patterning and structure of  
339 peacock feathers.

#### 340 **Adaptive Evolution in Immune-related Genes**

341 In birds, the rate of sequence divergence in immune-related genes is usually higher than the  
342 other genes primarily due to the co-evolution of host-pathogen interactions (Ekblom et al.,  
343 2010). Several genes involved in the development of immune system and modulation of  
344 immune response have shown sequence divergence and signs of adaptive evolution in the  
345 peacock genome.

346 Multiple components of the innate immune system such as complement system and pathogen  
347 recognition system showed adaptive evolution. The C5 protein involved in the recruitment of  
348 cellular component of the immune system at the site of infection showed five unique  
349 substitutions. The  $\alpha$ -subunit of C8 protein involved in forming the membrane attack complex  
350 (MAC)(Serna et al., 2016) showed MSA. Additionally, the CSF-1R gene, which is crucial for  
351 macrophage survival, differentiation, and proliferation (Pixley and Stanley, 2004), showed  
352 positive selection with positively selected sites and unique substitutions. Different  
353 components of NF- $\kappa$ B signaling such as MYD88, TRADD, SIGIRR, MAP3K14 and TLR5,  
354 which regulate the immune response against infections (Kaisho and Akira, 2006), showed  
355 signs of adaptations. The MYD88 protein, which is a part of Toll-like receptors (TLRs)  
356 mediated signaling, showed MSA and higher divergence from chicken in comparison to  
357 turkey among the species of the Galliformes order. Similarly, the genes TRADD, SIGIRR,  
358 MAP3K14, and TLR5 showed multiple unique substitutions. Furthermore, the pattern  
359 recognition receptors such as NLRC3, which regulates innate immune response by interacting  
360 with stimulators of interferon genes (Zhang et al., 2014), showed positive selection with  
361 positively selected sites and unique substitution.

362 Several genes regulating the T and B-cell response of the adaptive immune system also  
363 displayed adaptive evolution in peacock. The SPI-1 gene involved in B and T cell

364 development by regulating the expression as well as alternative splicing of target genes  
365 (Hallier et al., 1998) showed MSA. The ITGAV and AQP3 genes, which are involved in T-  
366 cell movement and migration, showed unique substitutions and higher (2X) divergence from  
367 chicken as compared to turkey. Furthermore, different T-cell receptors and signaling proteins  
368 involved in T-cell activation such as SDC4, FLT4, NFATC3, and IL12B subunit showed  
369 sequence divergence and multiple signs of adaptation in peacock. CTLA4 gene, which is a  
370 negative regulator of T-cell response (Walunas et al., 1994), also showed multiple unique  
371 substitutions. A few other regulator genes of immune response also showed multiple signs of  
372 adaptation in peacock and are discussed in Supplementary Note. In addition, the gene family  
373 SSC4D involved in the development of immune system and the regulation of both innate and  
374 adaptive immunity (Asratian and Vasil'eva, 1976) showed expansion in peacock in  
375 comparison to chicken (**Supplementary Table 8**).

376 Taken together, it appears that the adaptive evolution of immune-related genes in peacock has  
377 occurred primarily in the components of innate immunity such as complement system,  
378 pattern recognition receptors, and monocyte development, and in the components of adaptive  
379 immunity such as T-cell response. It suggests that the immune system-related genes in  
380 peacock genome have significantly evolved to provide a selective advantage in fighting  
381 against infections.

### 382 **Body Dimensions**

383 Follicle stimulating hormone receptor (FSHR), which is involved in regulating the cell  
384 growth, differentiation, and body dimensions of birds via cAMP-mediated PI3K-AKT and  
385 SRC-ERK1/2 signaling (Fayeye et al., 2006), showed multiple unique substitutions. Several  
386 genes such as MMP2, BMP7, TRAF6, TNF3, Neurochondrin, IGF, and NOX4, regulating  
387 bone morphogenesis and development in birds showed divergence as well as adaptive  
388 evolution in peacock. These genes primarily function as ligands or receptors for Wnt-beta-  
389 catenin, TGF-beta, p70S6K and PEDF signaling pathways. From these observations, it  
390 appears that the adaptive evolution of intracellular signaling and early development genes,  
391 which play significant roles in bone and skeletal muscle development, are perhaps beneficial  
392 for supporting its body dimensions.

### 393 **MSA genes involved in other cellular processes**

394 Among the other genes that displayed multiple signs of adaptation, BRCA2, DNA-PKcs,  
395 FANCC, and INO80 genes were involved in the DNA double-strand break repair and

396 recombination, FBXO15, USP53, and PSMD1-26S were part of ubiquitin-proteasomal  
397 protein degradation system, HERPUD1 and HSP90B1 genes were involved in stress  
398 response, and METTL5 gene had protein methyltransferase activity. Thus, DNA repair and  
399 protein turnover and modification were among the other cellular processes where a notable  
400 number of genes showed MSA.

401

## 402 **DISCUSSION**

403 The most significant results emerged from the adaptive sequence divergence analysis, where  
404 a major fraction of genes involved in early development and immune system showed multiple  
405 signs of adaptive evolution (**Figure 4**). Similarly, the genes involved in the early  
406 development of feathers showed signs of adaptive evolution in the feather-specific gene set.  
407 In addition, the adaptive divergence observed in the genes involved in bone morphogenesis  
408 and skeletal muscle development perhaps explain the large body dimensions, stronger legs  
409 and spurs, and the ability to take short flights despite of a long train. Taken together, the  
410 evolution in the early development genes emerges as a prominent factor for explaining the  
411 molecular basis of the phenotypic evolution for Indian peacock.

412 Though birds are the natural host of viruses and are also prone to avian viral infections  
413 (Alexander, 2000;Berg, 2000;Liu et al., 2005), peacocks have a longer average life span, and  
414 are also found to be resistant to the new viral strain pathogenic to chicken and turkey (Sun et  
415 al., 2007), pointing towards the presence of a robust immune system. The strong immunity  
416 against pathogens and infections could be attributed to the adaptive divergence observed in  
417 the components of the innate immune system (complement and pathogen recognition  
418 system), adaptive immune response (B and T cell development), and other genes responsible  
419 for the overall immune system development. The adaptive evolution observed for immune  
420 genes in peacock appears to be indicative of a higher parasite load consistent with Hamilton-  
421 Zuk hypothesis (Balenger and Zuk, 2014). Though the results were obtained from the  
422 comparative genomic analysis of peacock, some of the insights may also be applicable to the  
423 other related species in the pheasant group. The comparative genomic analysis presented in  
424 this work provides novel insights on the phenotypic evolution of Indian Peacock and the  
425 genomic clues from this study will serve as leads for further studies to decipher the genotype-  
426 phenotype interactions for peacock. In addition, this study will also help in devising better  
427 strategies for the management and conservation of peacock population, which is showing a

428 decline mainly because of habitat deterioration, poaching for train-feathers, use of pesticides  
429 and chemical fertilizers.

430

431

## 432 **FIGURE LEGENDS**

433 **Figure 1: Effective population size ( $N_e$ ) estimated from PSMC analysis for Peacock.** The  
434 changes in effective population size ( $N_e$ ) for the peacock is shown as the blue line plot. The  
435 thick line represents the consensus, and the thin light line corresponds to 100 bootstrapping  
436 rounds. Atmospheric and deep ocean temperatures from (Bintanja and Van de Wal, 2008)  
437 have been overlaid.

## 438 **Figure 2: [A] Venn diagram of gene families identified using TreeFam.**

439 A total of 9,545 gene families were common among the five bird genomes. 522 gene families  
440 were unique to the genus (*Pavo*, *Gallus* and *Meleagris*) of Galliformes order, whereas, 637  
441 gene families were unique to the genus (*Ficedula* and *Taeniopygia*) of Passeriformes order.

## 442 **[B] Gene gain/loss in the six avian species and anole**

443 The number of gene gain (+) and loss (-) are mentioned on the right of the taxa (branches),  
444 for the six avian species and an outlier green anole. The gene gain and loss were calculated  
445 using CAFE two-lambda model with  $\lambda = 0.0055$  for Galliformes and  $\lambda = 0.0014$  for the rest of  
446 the tree.

## 447 **Figure 3: [A] Phylogenetic relationship of peacock with other bird genomes**

448 The phylogenetic tree constructed from the concatenated alignments of the orthologous genes  
449 across all six species. The divergence time of different bird species was determined using the  
450 TIMETREE database (Hedges et al., 2006), which is based on the published reports of  
451 molecular and fossil data. The origin of turkey was estimated to be 37.2 mya, whereas the  
452 origin of peacock and chicken was estimated to be 32.9 mya.

## 453 **[B] Comparison of the distribution of $\omega$ or dN/dS values for the pairs of birds in** 454 **Galliformes order: peacock-chicken (PG) and peacock-turkey (PT).**

455 The calculation was performed using 9,078 orthologous genes by employing CODEML  
456 program of PAML package v4.9a. The actual values were log-transformed to the base of 2  
457 and mean values for the PG and PT pairs were -4.4 and -3.8, respectively.

#### 458 **Figure 4: Adaptively evolved signaling pathways in peacock genome**

459 The genes highlighted in Red colour showed signs of adaptive evolution such as positive  
460 selection and unique substitution. It is apparent that the receptors, ligands and regulators of  
461 early development pathways such as Wnt, TGF- $\beta$  and BMP, showed adaptive sequence  
462 divergence in peacock. In the case of NF-KB, cytokine and growth factor signaling pathways,  
463 the proteins involved in intermediate signal transduction also showed adaptive sequence  
464 divergence. Individual pathways are colour coded separately.

465

466

467

#### 468 **Competing financial interests**

469 The authors declare no competing financial interests.

470

#### 471 **Contributions**

472 VKS conceived and coordinated the project. RS prepared the DNA samples, performed  
473 sequencing and the molecular sexing assay. AG performed the *de novo* and reference-based  
474 genome assembly. PM, AKS, AG and SKJ performed the genome annotations. SKJ and PM  
475 performed the phylogenetic tree analyses. SKJ performed the dN/dS, positive selection, and  
476 statistical analysis. SKJ, AG and AR performed the unique substitution and SIFT analyses.  
477 PM performed the gene gain/loss analysis. SKJ, VPPK and AG created figures. SKJ, AG,  
478 VKS, NV, and AS analysed the data and wrote the manuscript. All the authors have read and  
479 approved the final manuscript.

480

#### 481 **Acknowledgements**

482 We thank Dr. Atul Gupta, Wildlife Veterinary Officer, Van Vihar National Park, Bhopal and  
483 Director, Van Vihar National Park, Bhopal, India for providing the blood samples of  
484 peacock. We also acknowledge the help of Dr. Tista Joseph and Dr. Niraj Dahe, Wildlife  
485 Veterinary Officers (Wildlife SOS India) at Van Vihar National Park for carrying out the  
486 sample collection procedure. We thank the HPC facility and NGS facility at IISER Bhopal.  
487 The authors SKJ, AG and RS thank the Department of Science and Technology for the DST-  
488 INSPIRE fellowship. We also thank the intramural research funds provided by IISER Bhopal.



## 489 REFERENCES

- 490 Alexander, D.J. (2000). A review of avian influenza in different bird species. *Vet Microbiol* 74, 3-13.
- 491 Asratian, A.A., and Vasil'eva, V.I. (1976). [Immunological structure of the population of Erevan with  
492 regard to *Mycoplasma hominis*]. *Zh Eksp Klin Med* 16, 59-61.
- 493 Balenger, S.L., and Zuk, M. (2014). "Testing the Hamilton–Zuk hypothesis: past, present, and future".  
494 The Society for Integrative and Comparative Biology).
- 495 Berg, T.P. (2000). Acute infectious bursal disease in poultry: a review. *Avian Pathol* 29, 175-194.
- 496 Bintanja, R., and Van De Wal, R. (2008). North American ice-sheet dynamics and the onset of  
497 100,000-year glacial cycles. *Nature* 454, 869-872.
- 498 Bornelöv, S., Seroussi, E., Yosefi, S., Pendavis, K., Burgess, S.C., Grabherr, M., Friedman-Einat, M., and  
499 Andersson, L. (2017). Correspondence on Lovell et al.: identification of chicken genes  
500 previously assumed to be evolutionarily lost. *Genome biology* 18, 112.
- 501 Brack, A.S., Conboy, M.J., Roy, S., Lee, M., Kuo, C.J., Keller, C., and Rando, T.A. (2007). Increased Wnt  
502 signaling during aging alters muscle stem cell fate and increases fibrosis. *Science* 317, 807-  
503 810.
- 504 Chuong, C.M., Chodankar, R., Widelitz, R.B., and Jiang, T.X. (2000). Evo-devo of feathers and scales:  
505 building complex epithelial appendages. *Curr Opin Genet Dev* 10, 449-456.
- 506 Crowe, R., Henrique, D., Ish-Horowicz, D., and Niswander, L. (1998). A new role for Notch and Delta  
507 in cell fate decisions: patterning the feather array. *Development* 125, 767-775.
- 508 Denton, J.F., Lugo-Martinez, J., Tucker, A.E., Schrider, D.R., Warren, W.C., and Hahn, M.W. (2014).  
509 Extensive error in the number of genes inferred from draft genome assemblies. *PLoS*  
510 *computational biology* 10, e1003998.
- 511 Edgar, R.C. (2004). MUSCLE: multiple sequence alignment with high accuracy and high throughput.  
512 *Nucleic Acids Res* 32, 1792-1797.
- 513 Ekblom, R., French, L., Slate, J., and Burke, T. (2010). Evolutionary analysis and expression profiling of  
514 zebra finch immune genes. *Genome Biol Evol* 2, 781-790.
- 515 Fayeye, T., Ayorinde, K., Ojo, V., and Adesina, O. (2006). Frequency and influence of some major  
516 genes on body weight and body size parameters of Nigerian local chickens. *Livestock*  
517 *research for rural development* 18, 37.
- 518 Groppe, J., Greenwald, J., Wiater, E., Rodriguez-Leon, J., Economides, A.N., Kwiatkowski, W., Affolter,  
519 M., Vale, W.W., Izpisua Belmonte, J.C., and Choe, S. (2002). Structural basis of BMP signalling  
520 inhibition by the cystine knot protein Noggin. *Nature* 420, 636-642.
- 521 Guindon, S., Dufayard, J.F., Lefort, V., Anisimova, M., Hordijk, W., and Gascuel, O. (2010). New  
522 algorithms and methods to estimate maximum-likelihood phylogenies: assessing the  
523 performance of PhyML 3.0. *Syst Biol* 59, 307-321.
- 524 Hallier, M., Lerga, A., Barnache, S., Tavitian, A., and Moreau-Gachelin, F. (1998). The transcription  
525 factor Spi-1/PU.1 interacts with the potential splicing factor TLS. *J Biol Chem* 273, 4838-4842.
- 526 Han, M.V., Thomas, G.W., Lugo-Martinez, J., and Hahn, M.W. (2013). Estimating gene gain and loss  
527 rates in the presence of error in genome assembly and annotation using CAFE 3. *Mol Biol*  
528 *Evol* 30, 1987-1997.
- 529 Hedges, S.B., Dudley, J., and Kumar, S. (2006). TimeTree: a public knowledge-base of divergence  
530 times among organisms. *Bioinformatics* 22, 2971-2972.
- 531 Huang, Y., Li, Y., Burt, D.W., Chen, H., Zhang, Y., Qian, W., Kim, H., Gan, S., Zhao, Y., and Li, J. (2013).  
532 The duck genome and transcriptome provide insight into an avian influenza virus reservoir  
533 species. *Nature genetics* 45, 776.
- 534 Huerta-Cepas, J., Szklarczyk, D., Forslund, K., Cook, H., Heller, D., Walter, M.C., Rattei, T., Mende,  
535 D.R., Sunagawa, S., Kuhn, M., Jensen, L.J., Von Mering, C., and Bork, P. (2016). eggNOG 4.5: a  
536 hierarchical orthology framework with improved functional annotations for eukaryotic,  
537 prokaryotic and viral sequences. *Nucleic Acids Res* 44, D286-293.
- 538 Huxley, T.H. (1968). *On the origin of species*. University of Michigan P.

- 539 Kaiser, V.B., Van Tuinen, M., and Ellegren, H. (2007). Insertion events of CR1 retrotransposable  
540 elements elucidate the phylogenetic branching order in galliform birds. *Mol Biol Evol* 24,  
541 338-347.
- 542 Kaisho, T., and Akira, S. (2006). Toll-like receptor function and signaling. *J Allergy Clin Immunol* 117,  
543 979-987; quiz 988.
- 544 Kan, X.-Z., Li, X.-F., Lei, Z.-P., Chen, L., Gao, H., Yang, Z.-Y., Yang, J.-K., Guo, Z.-C., Yu, L., and Zhang, L.-  
545 Q. (2010). Estimation of divergence times for major lineages of galliform birds: evidence  
546 from complete mitochondrial genome sequences. *African Journal of Biotechnology* 9, 3073-  
547 3078.
- 548 Kanehisa, M., and Goto, S. (2000). KEGG: kyoto encyclopedia of genes and genomes. *Nucleic Acids*  
549 *Res* 28, 27-30.
- 550 Kimball, R.T., Braun, E.L., Zwartjes, P.W., Crowe, T.M., and Ligon, J.D. (1999). A molecular phylogeny  
551 of the pheasants and partridges suggests that these lineages are not monophyletic. *Mol*  
552 *Phylogenet Evol* 11, 38-54.
- 553 Klaus, A., and Birchmeier, W. (2008). Wnt signalling and its impact on development and cancer. *Nat*  
554 *Rev Cancer* 8, 387-398.
- 555 Kumar, P., Henikoff, S., and Ng, P.C. (2009). Predicting the effects of coding non-synonymous  
556 variants on protein function using the SIFT algorithm. *Nat Protoc* 4, 1073-1081.
- 557 Li, H., and Durbin, R. (2011). Inference of human population history from individual whole-genome  
558 sequences. *Nature* 475, 493-496.
- 559 Lim, X., and Nusse, R. (2013). Wnt signaling in skin development, homeostasis, and disease. *Cold*  
560 *Spring Harb Perspect Biol* 5.
- 561 Liu, J., Xiao, H., Lei, F., Zhu, Q., Qin, K., Zhang, X.W., Zhang, X.L., Zhao, D., Wang, G., Feng, Y., Ma, J.,  
562 Liu, W., Wang, J., and Gao, G.F. (2005). Highly pathogenic H5N1 influenza virus infection in  
563 migratory birds. *Science* 309, 1206.
- 564 Lovell, P.V., Wirthlin, M., Wilhelm, L., Minx, P., Lazar, N.H., Carbone, L., Warren, W.C., and Mello,  
565 C.V. (2014). Conserved syntenic clusters of protein coding genes are missing in birds.  
566 *Genome biology* 15, 565.
- 567 Loveridge, N., Farquharson, C., Hesketh, J.E., Jakowlew, S.B., Whitehead, C.C., and Thorp, B.H.  
568 (1993). The control of chondrocyte differentiation during endochondral bone growth in vivo:  
569 changes in TGF-beta and the proto-oncogene c-myc. *J Cell Sci* 105 ( Pt 4), 949-956.
- 570 Loyau, A., Jalme, M.S., and Sorci, G. (2005a). Intra- and Intersexual Selection for Multiple Traits in the  
571 Peacock (*Pavo cristatus*). *Ethology* 111, 810-820.
- 572 Loyau, A., Saint Jalme, M., Cagniant, C., and Sorci, G. (2005b). Multiple sexual advertisements  
573 honestly reflect health status in peacocks (*Pavo cristatus*). *Behavioral Ecology and*  
574 *Sociobiology* 58, 552-557.
- 575 Moyle, W.R., Campbell, R.K., Myers, R.V., Bernard, M.P., Han, Y., and Wang, X. (1994). Co-evolution  
576 of ligand-receptor pairs. *Nature* 368, 251-255.
- 577 Nadachowska-Brzyska, K., Li, C., Smeds, L., Zhang, G., and Ellegren, H. (2015). Temporal dynamics of  
578 avian populations during Pleistocene revealed by whole-genome sequences. *Current Biology*  
579 25, 1375-1380.
- 580 Nadachowska-Brzyska, K., Burri, R., Smeds, L., and Ellegren, H. (2016). PSMC analysis of effective  
581 population sizes in molecular ecology and its application to black-and-white *Ficedula*  
582 flycatchers. *Molecular Ecology* 25, 1058-1072.
- 583 Nie, X., Luukko, K., and Kettunen, P. (2006). BMP signalling in craniofacial development. *Int J Dev Biol*  
584 50, 511-521.
- 585 Nishimura, R., Hata, K., Matsubara, T., Wakabayashi, M., and Yoneda, T. (2012). Regulation of bone  
586 and cartilage development by network between BMP signalling and transcription factors. *J*  
587 *Biochem* 151, 247-254.
- 588 O'leary, N.A., Wright, M.W., Brister, J.R., Ciufu, S., Haddad, D., Mcveigh, R., Rajput, B., Robbertse, B.,  
589 Smith-White, B., Ako-Adjei, D., Astashyn, A., Badretdin, A., Bao, Y., Blinkova, O., Brover, V.,

- 590 Chetvernin, V., Choi, J., Cox, E., Ermolaeva, O., Farrell, C.M., Goldfarb, T., Gupta, T., Haft, D.,  
591 Hatcher, E., Hlavina, W., Joardar, V.S., Kodali, V.K., Li, W., Maglott, D., Masterson, P.,  
592 Mcgarvey, K.M., Murphy, M.R., O'neill, K., Pujar, S., Rangwala, S.H., Rausch, D., Riddick, L.D.,  
593 Schoch, C., Shkeda, A., Storz, S.S., Sun, H., Thibaud-Nissen, F., Tolstoy, I., Tully, R.E., Vatsan,  
594 A.R., Wallin, C., Webb, D., Wu, W., Landrum, M.J., Kimchi, A., Tatusova, T., Dicuccio, M.,  
595 Kitts, P., Murphy, T.D., and Pruitt, K.D. (2016). Reference sequence (RefSeq) database at  
596 NCBI: current status, taxonomic expansion, and functional annotation. *Nucleic Acids Res* 44,  
597 D733-745.
- 598 Ouyang, Y.-N., Yang, Z.-Y., Li, D.-L., Huo, J.-L., Qian, K., and Miao, Y.-W. (2009). Genetic Divergence  
599 between *Pavo muticus* and *Pavo cristatus* by Cyt b Gene. *Journal of Yunnan Agricultural*  
600 *University* 2, 014.
- 601 Owens, I.P., and Short, R.V. (1995). Hormonal basis of sexual dimorphism in birds: implications for  
602 new theories of sexual selection. *Trends Ecol Evol* 10, 44-47.
- 603 Pixley, F.J., and Stanley, E.R. (2004). CSF-1 regulation of the wandering macrophage: complexity in  
604 action. *Trends Cell Biol* 14, 628-638.
- 605 Pownall, M.E., and Isaacs, H.V. (Year). "Fgf signalling in vertebrate development", in: *Colloquium*  
606 *Series on Developmental Biology: Morgan & Claypool Life Sciences*, 1-75.
- 607 Ramesh, K., and MCGowan, P. (2009). On the current status of Indian peafowl *Pavo cristatus* (Aves:  
608 Galliformes: Phasianidae): keeping the common species common. *Journal of Threatened*  
609 *Taxa* 1, 106-108.
- 610 Rice, P., Longden, I., and Bleasby, A. (2000). EMBOSS: the European Molecular Biology Open  
611 Software Suite. *Trends Genet* 16, 276-277.
- 612 Serna, M., Giles, J.L., Morgan, B.P., and Bubeck, D. (2016). Structural basis of complement  
613 membrane attack complex formation. *Nat Commun* 7, 10587.
- 614 Stock, A.D., and Bunch, T.D. (1982). The evolutionary implications of chromosome banding pattern  
615 homologies in the bird order Galliformes. *Cytogenet Cell Genet* 34, 136-148.
- 616 Sun, L., Zhang, G.H., Jiang, J.W., Fu, J.D., Ren, T., Cao, W.S., Xin, C.A., Liao, M., and Liu, W.J. (2007). A  
617 Massachusetts prototype like coronavirus isolated from wild peafowls is pathogenic to  
618 chickens. *Virus Res* 130, 121-128.
- 619 Vilella, A.J., Severin, J., Ureta-Vidal, A., Heng, L., Durbin, R., and Birney, E. (2009). EnsemblCompara  
620 GeneTrees: Complete, duplication-aware phylogenetic trees in vertebrates. *Genome Res* 19,  
621 327-335.
- 622 Walunas, T.L., Lenschow, D.J., Bakker, C.Y., Linsley, P.S., Freeman, G.J., Green, J.M., Thompson, C.B.,  
623 and Bluestone, J.A. (1994). CTLA-4 can function as a negative regulator of T cell activation.  
624 *Immunity* 1, 405-413.
- 625 Wang, N., Kimball, R.T., Braun, E.L., Liang, B., and Zhang, Z. (2013). Assessing phylogenetic  
626 relationships among galliformes: a multigene phylogeny with expanded taxon sampling in  
627 Phasianidae. *PLoS One* 8, e64312.
- 628 Wright, A.E., Harrison, P.W., Zimmer, F., Montgomery, S.H., Pointer, M.A., and Mank, J.E. (2015).  
629 Variation in promiscuity and sexual selection drives avian rate of Faster-Z evolution.  
630 *Molecular Ecology* 24, 1218-1235.
- 631 Yang, Z. (2007). PAML 4: phylogenetic analysis by maximum likelihood. *Mol Biol Evol* 24, 1586-1591.
- 632 Yang, Z., Wong, W.S., and Nielsen, R. (2005). Bayes empirical bayes inference of amino acid sites  
633 under positive selection. *Mol Biol Evol* 22, 1107-1118.
- 634 Zahavi, A. (1975). Mate selection—A selection for a handicap. *Journal of Theoretical Biology* 53, 205-  
635 214.
- 636 Zhang, J., Nielsen, R., and Yang, Z. (2005). Evaluation of an improved branch-site likelihood method  
637 for detecting positive selection at the molecular level. *Mol Biol Evol* 22, 2472-2479.
- 638 Zhang, L., Mo, J., Swanson, K.V., Wen, H., Petrucelli, A., Gregory, S.M., Zhang, Z., Schneider, M.,  
639 Jiang, Y., and Fitzgerald, K.A. (2014). NLRC3, a member of the NLR family of proteins, is a

640 negative regulator of innate immune signaling induced by the DNA sensor STING. *Immunity*  
641 40, 329-341.

642

643

644

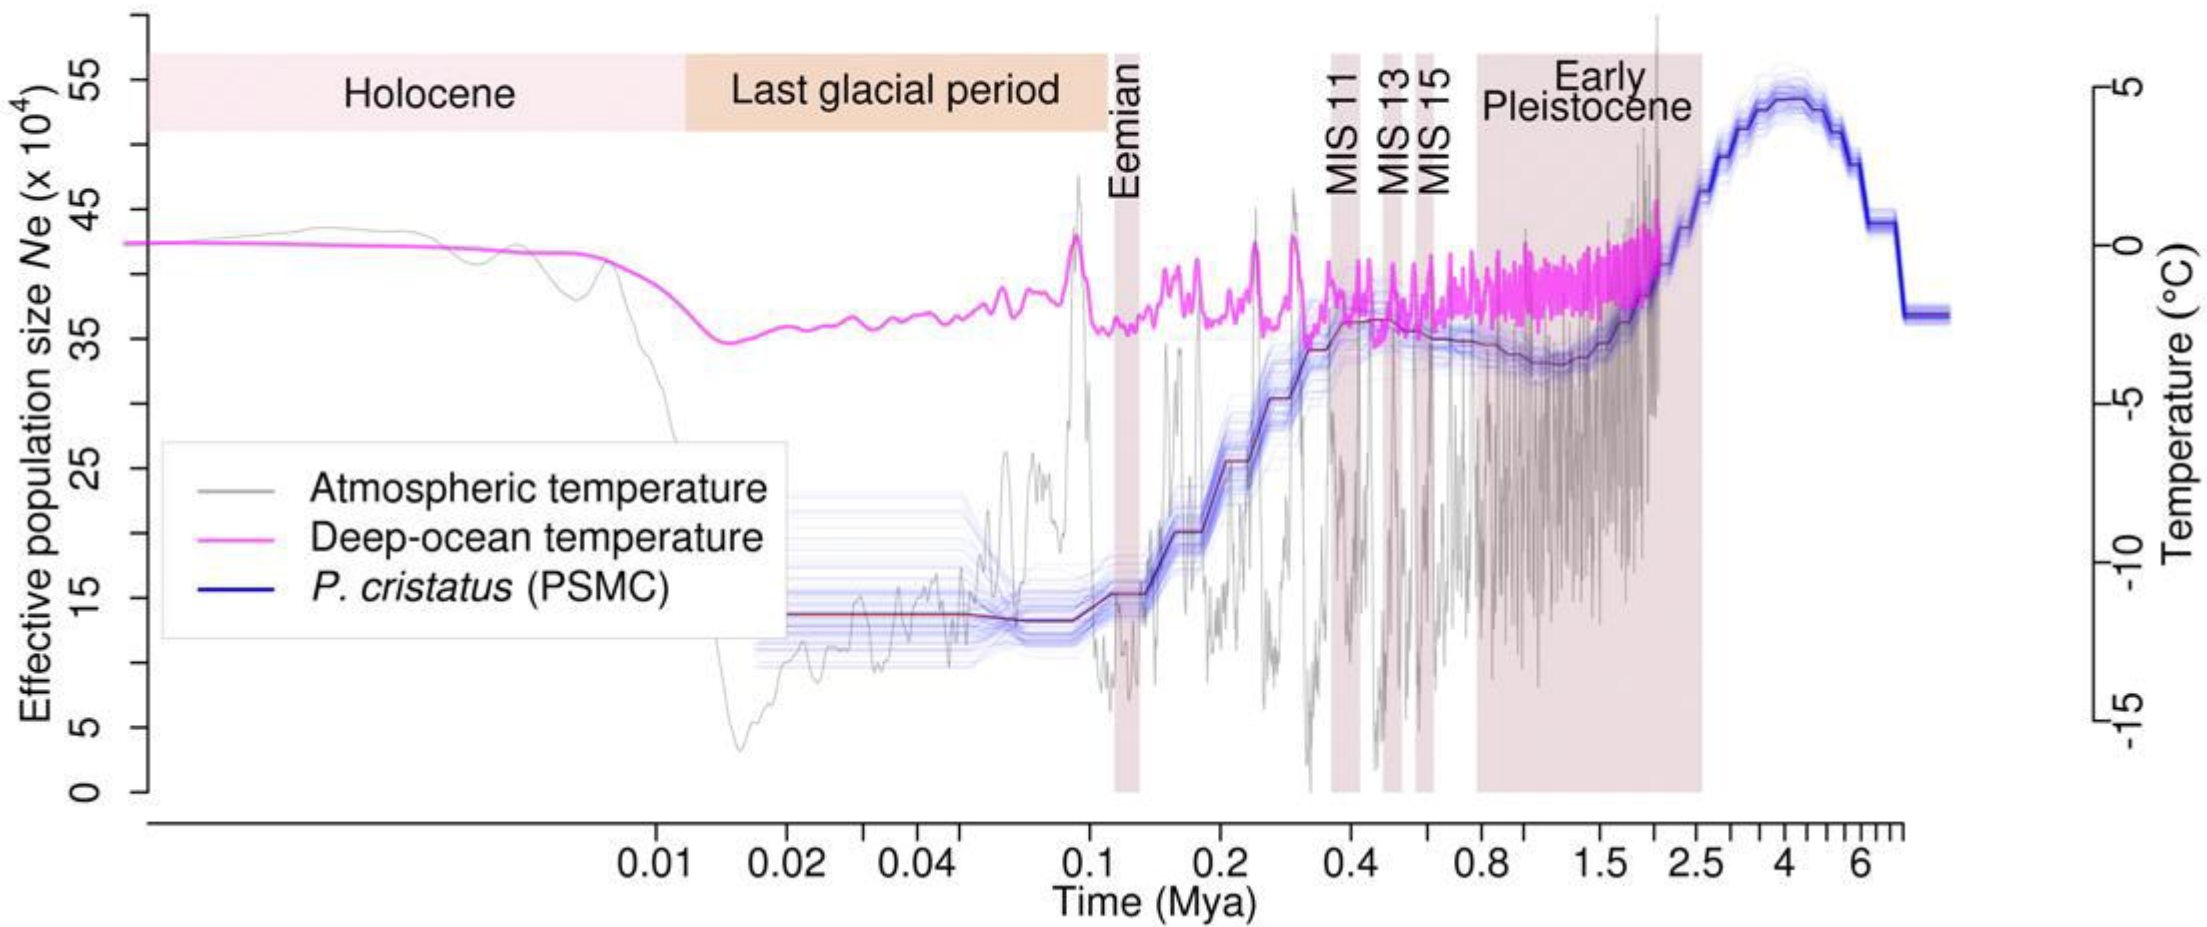

[ A ]

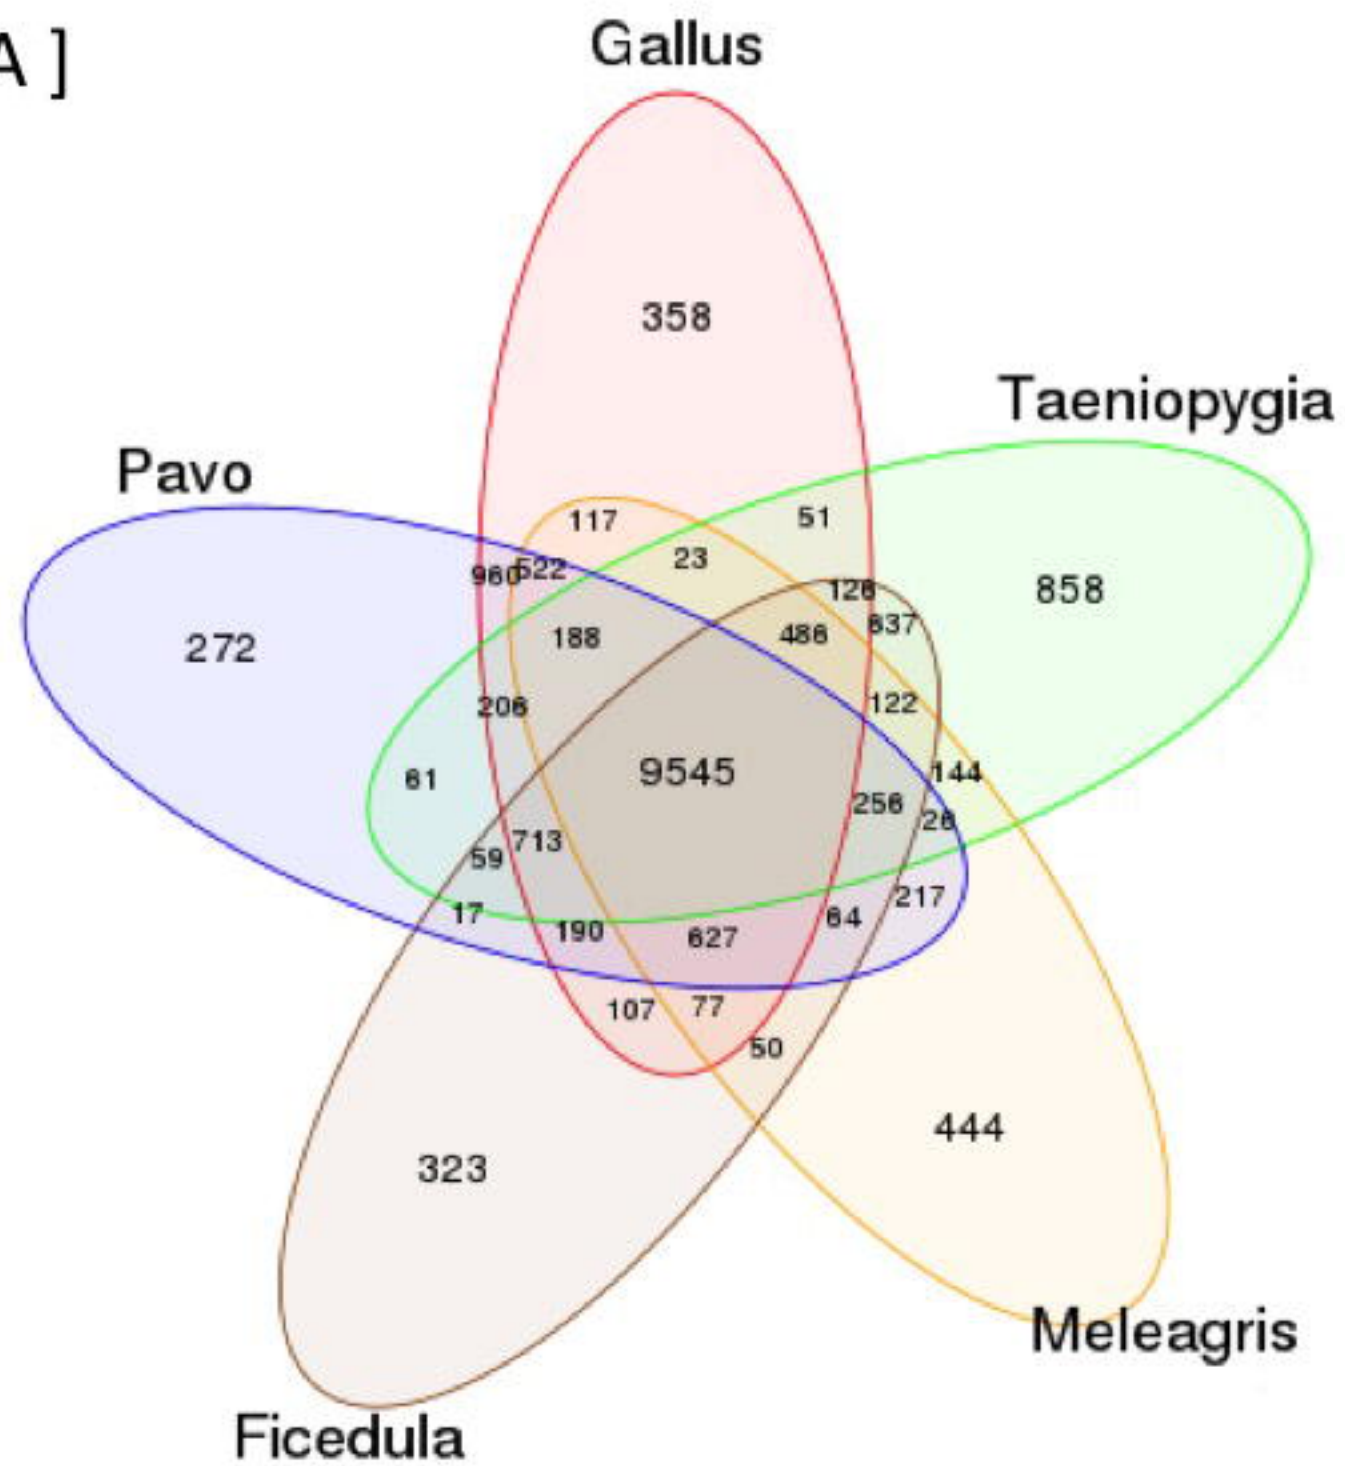

[ B ]

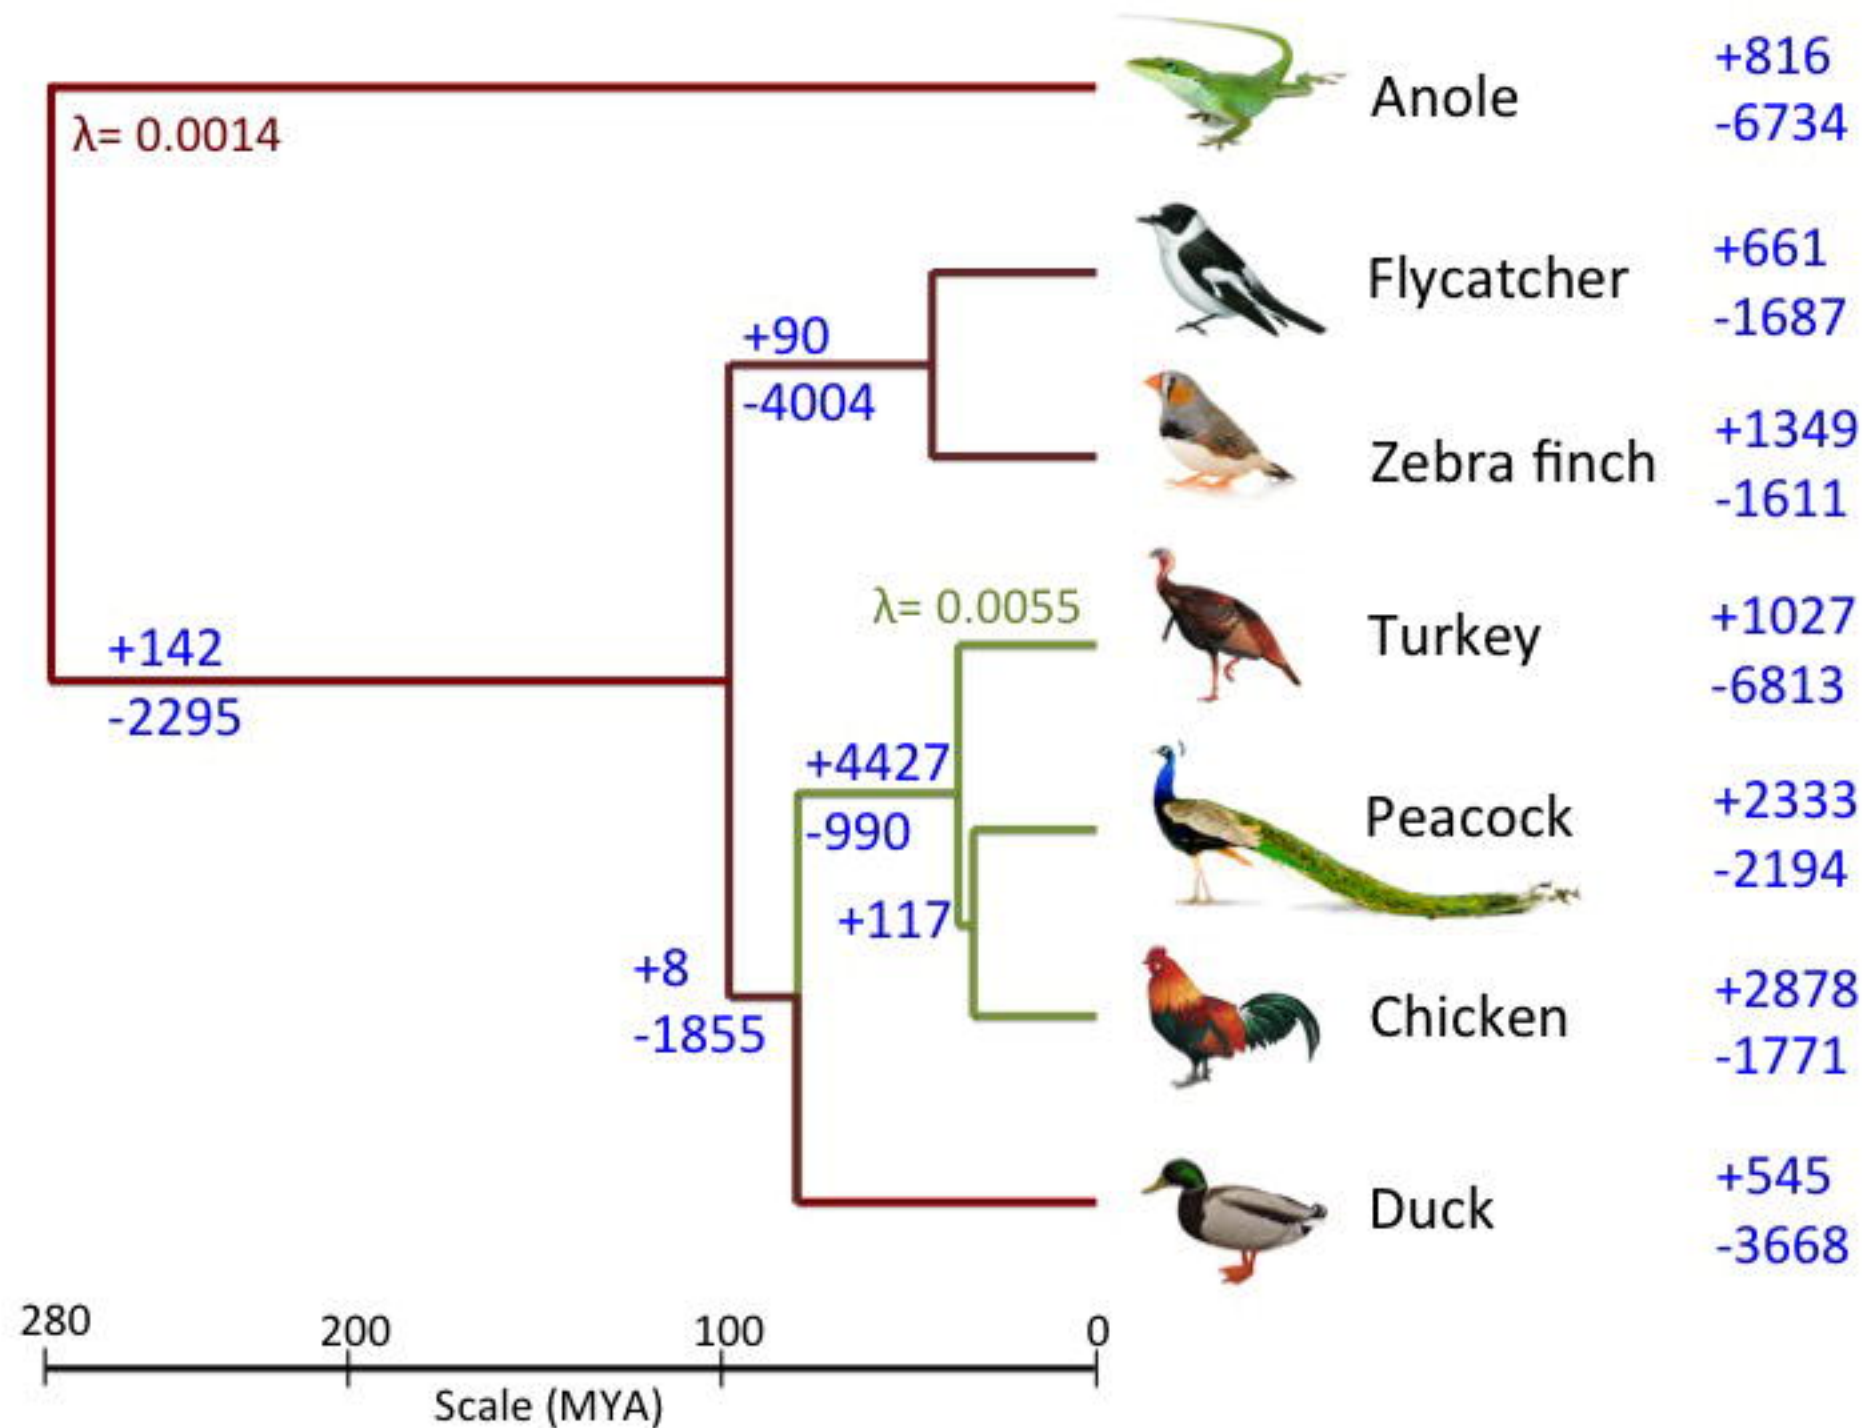

**[A]**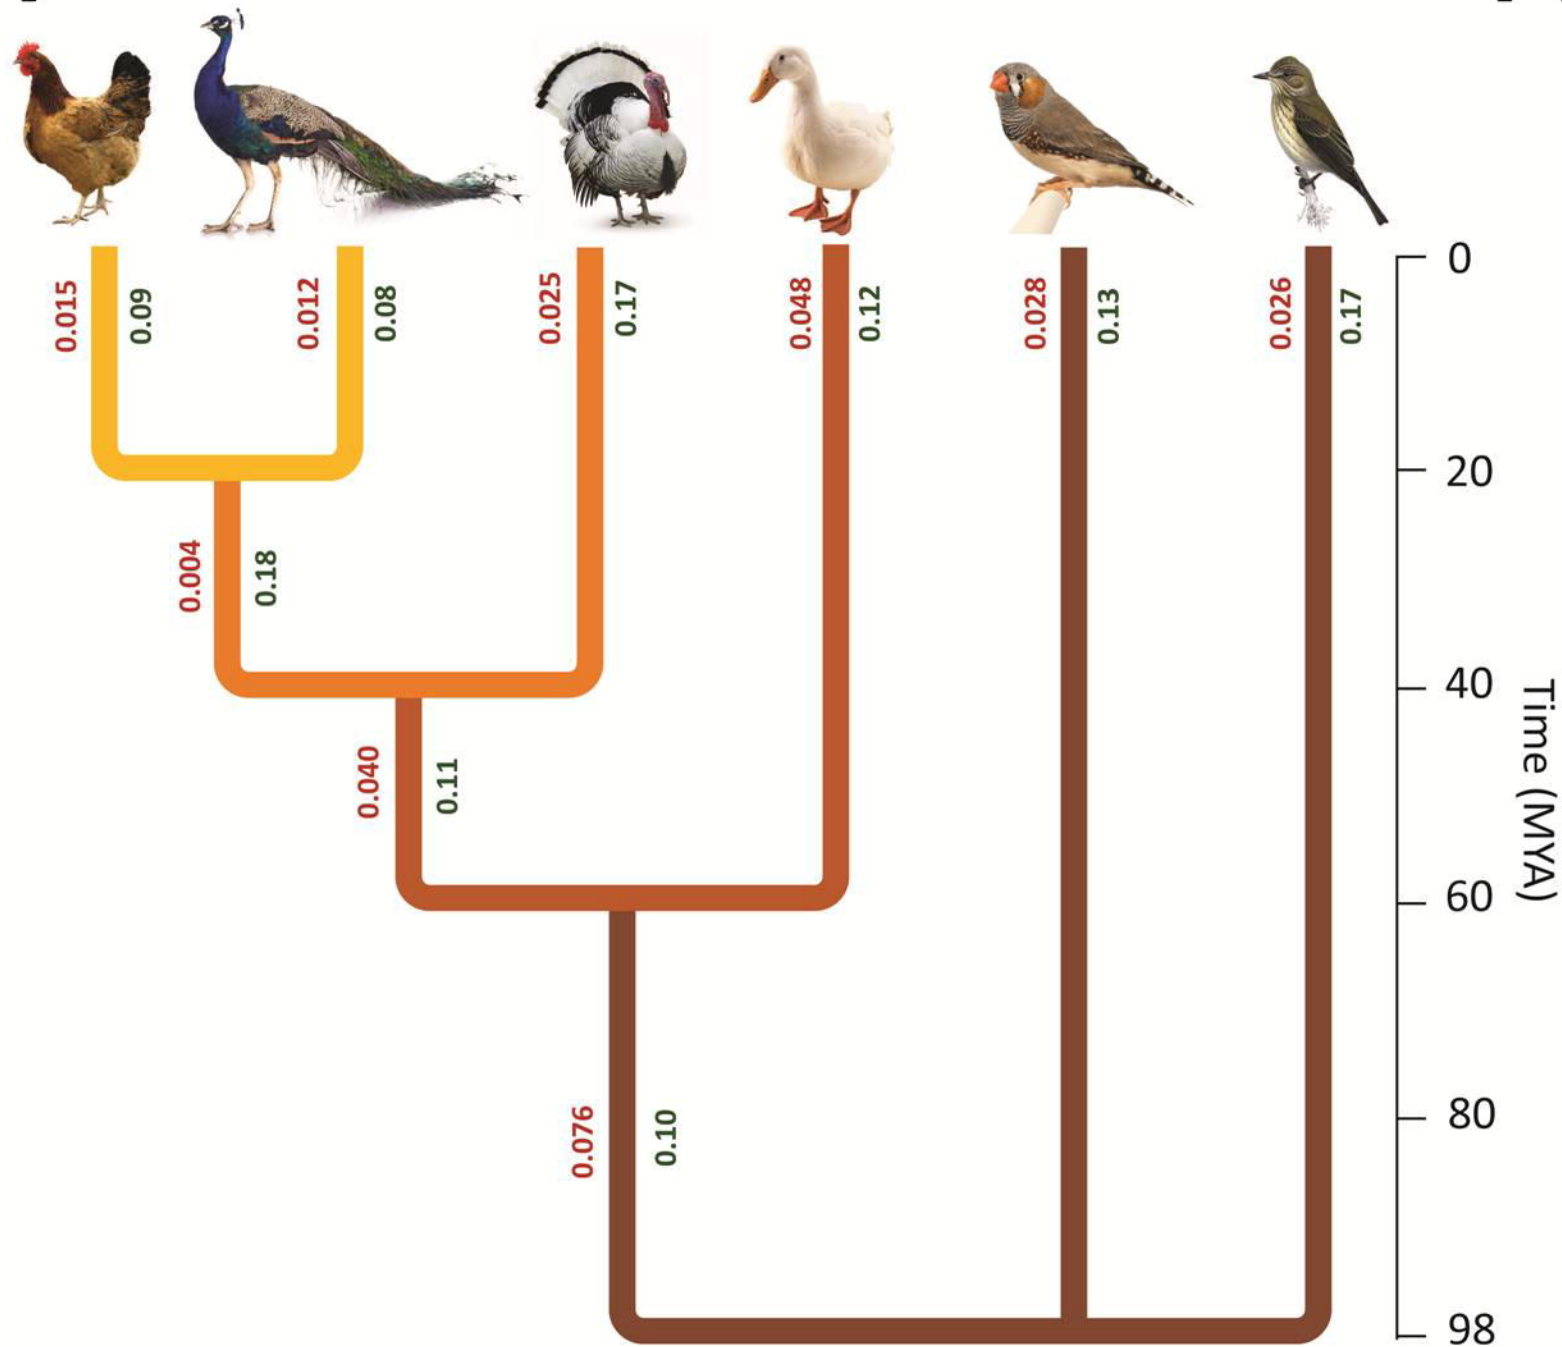**[B]**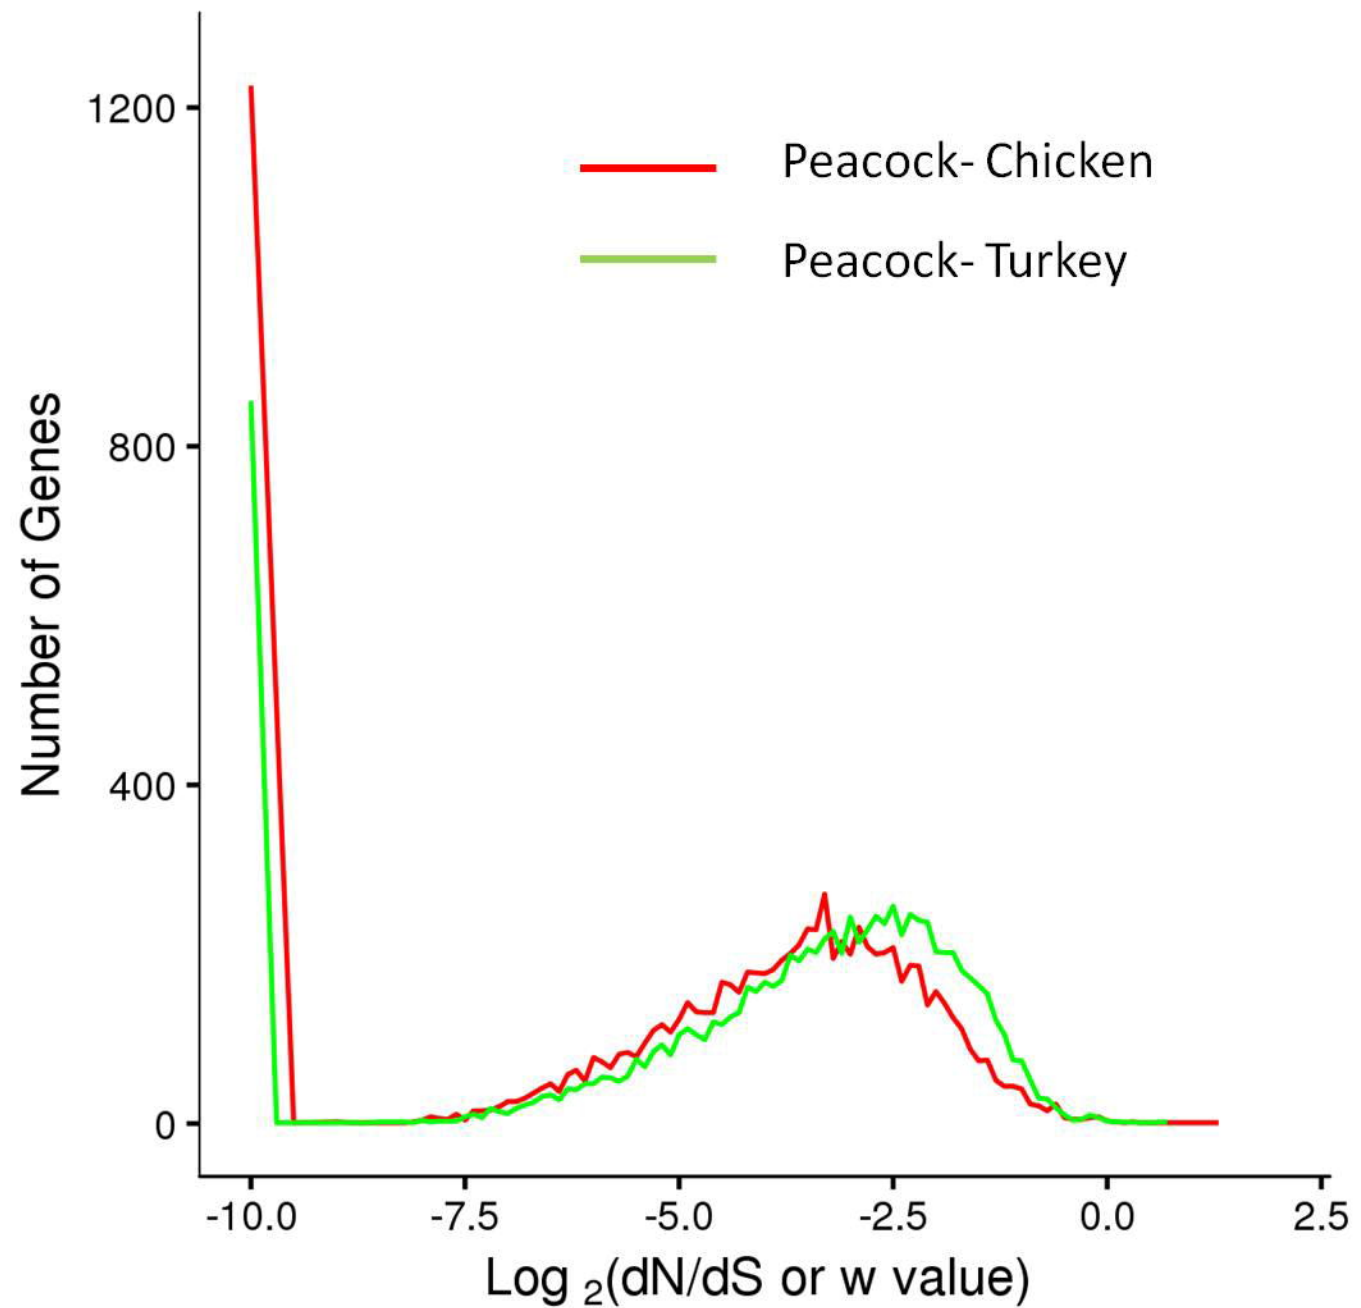

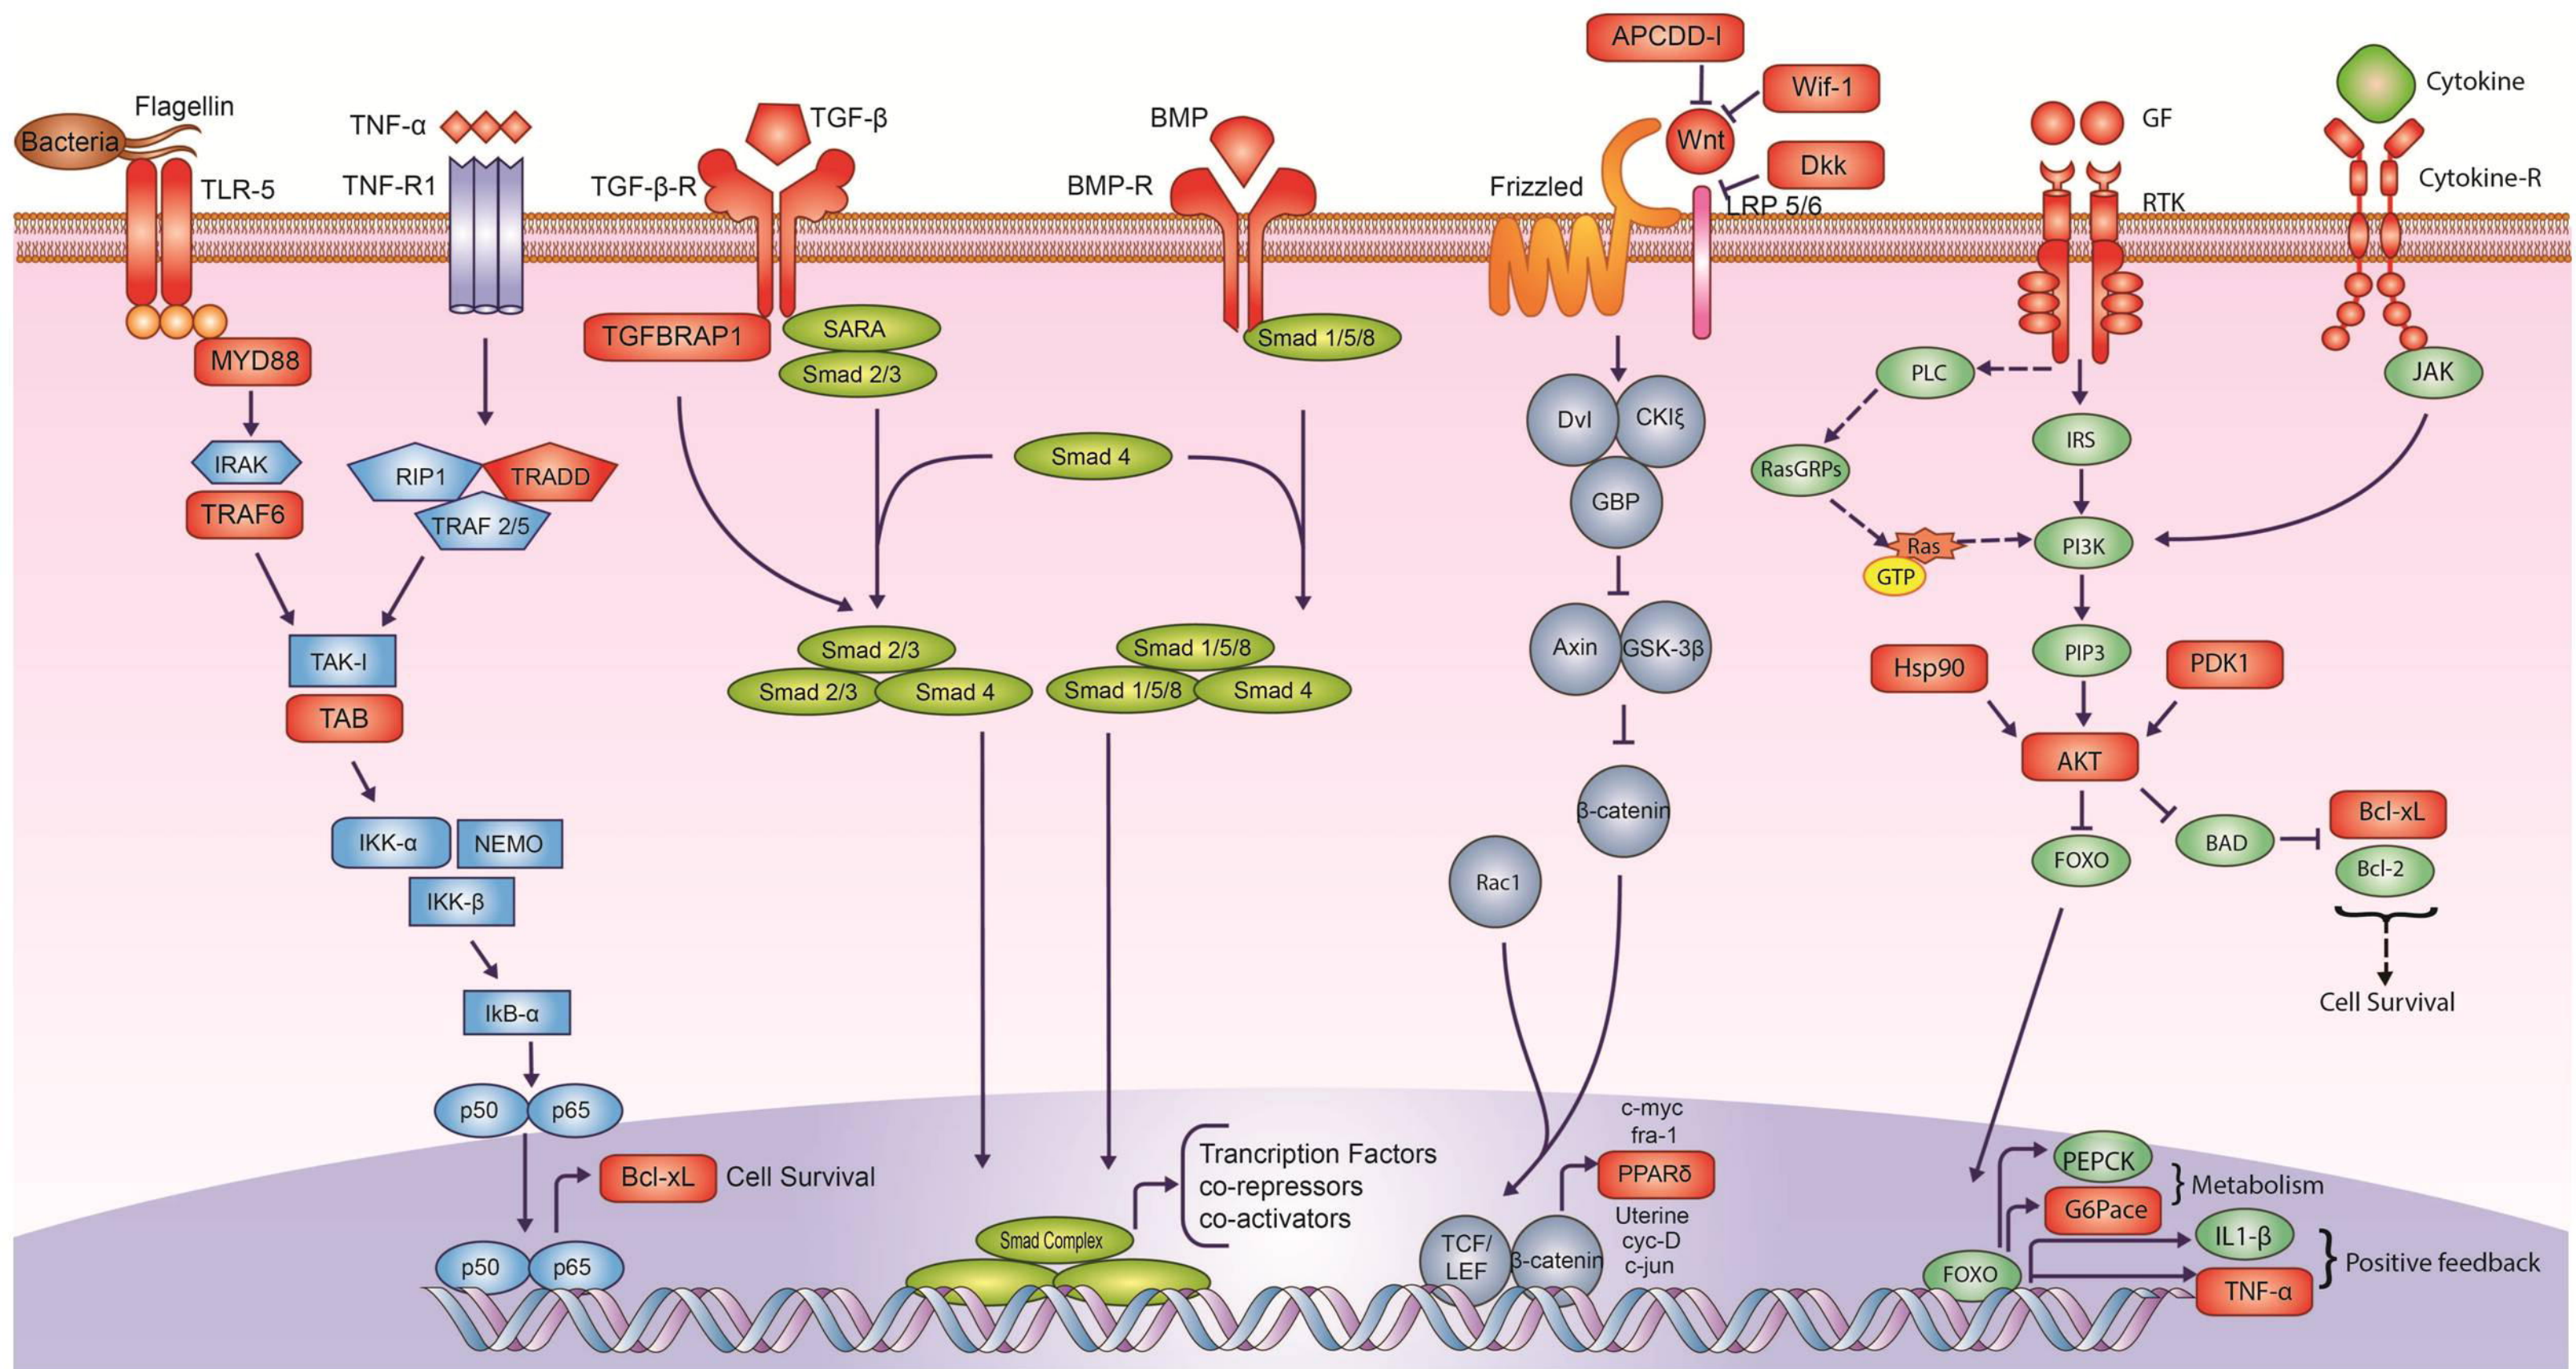

Source: https://www.biorxiv.org/content/biorxiv/early/2018/05/05/315457.full.pdf
